# Supplementary material for: Enhanced efficiency and high temperature stability of hybrid quantum dot light-emitting diodes using molybdenum oxide doped hole transport layer
Source: Royal Society of Chemistry journal article supplement (doi:10.1039/c9ra02946j), 2019-01-01
Supplement: c9ra02946j1.pdf [file c9ra02946j1.pdf]

Electronic Supplementary Information for

**Enhanced efficiency and high temperature stability of hybrid quantum dot light-emitting diodes using molybdenum oxide doped hole transport layer**

Jinyoung Yun,<sup>a</sup> Jeayun Kim,<sup>b</sup> Byung Jun Jung,<sup>c</sup> Gyutae Kim<sup>\*a</sup> and Jeonghun Kwak<sup>\*d</sup>

<sup>a</sup>*School of Electrical Engineering, Korea University, Seoul 02841, South Korea.*

<sup>b</sup>*School of Electrical and Computer Engineering, University of Seoul, Seoul 02504, South Korea.*

<sup>c</sup>*Department of Materials Science and Engineering, University of Seoul, Seoul 02504, South Korea*

<sup>d</sup>*Department of Electrical and Computer Engineering, Inter-university Semiconductor Research Center, Seoul National University, Seoul 08826, South Korea.*

\* Corresponding authors.

E-mail address: gtkim@korea.ac.kr (G. Kim), jkwak@snu.ac.kr (J. Kwak).

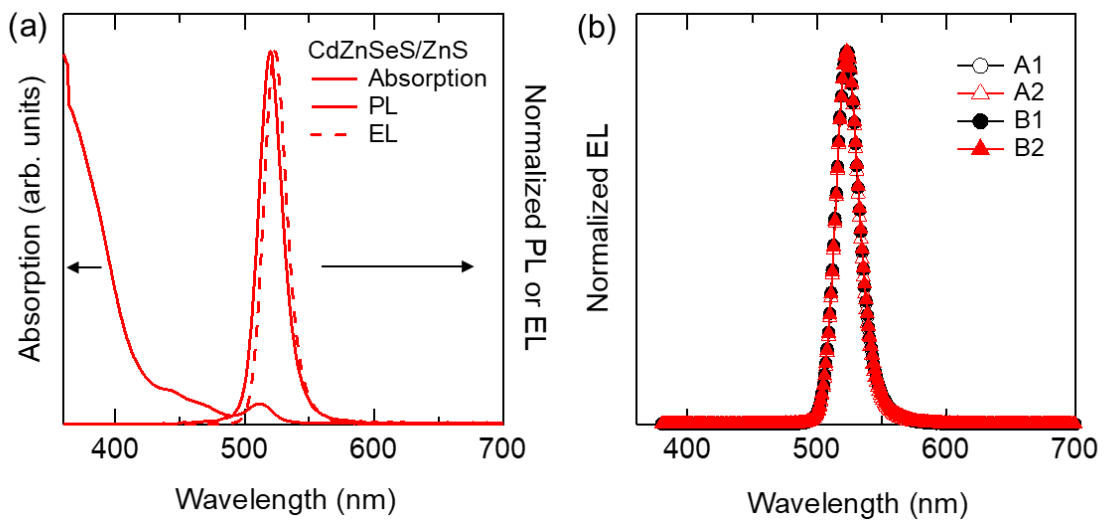

**Fig. S1.** (a) UV–Vis absorption, PL, and EL spectra of CdZnSeS/ZnS QDs and (b) EL spectrum of the QLEDs.

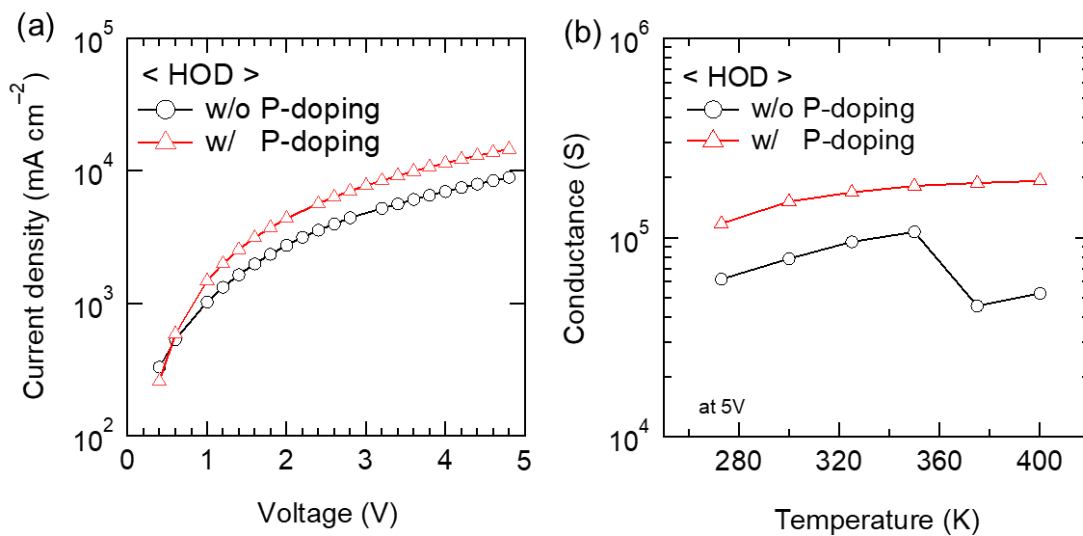

**Fig. S2.** (a) Current density–voltage characteristics and (b) conductance of the HODs consisting of ITO/MoO<sub>3</sub> (10 nm)/CBP (30 nm)/CBP:MoO<sub>3</sub> (20 nm, 10 vol%) or CBP (20 nm)/MoO<sub>3</sub> (10 nm)/Al (80 nm).

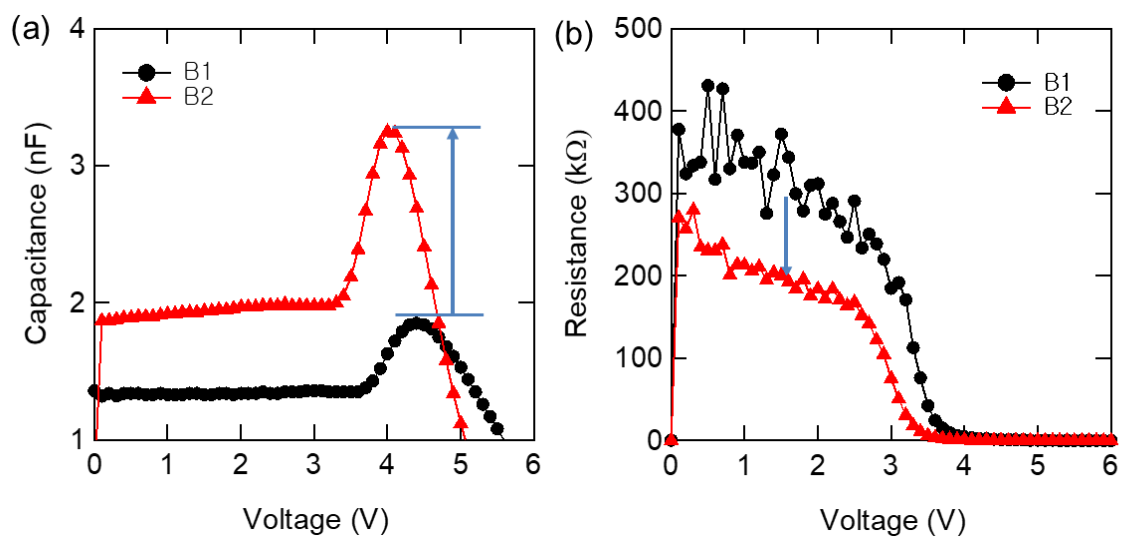

**Fig. S3.** (a) Capacitance–voltage and (b) resistance–voltage characteristics of Devices **B1** and **B2**.

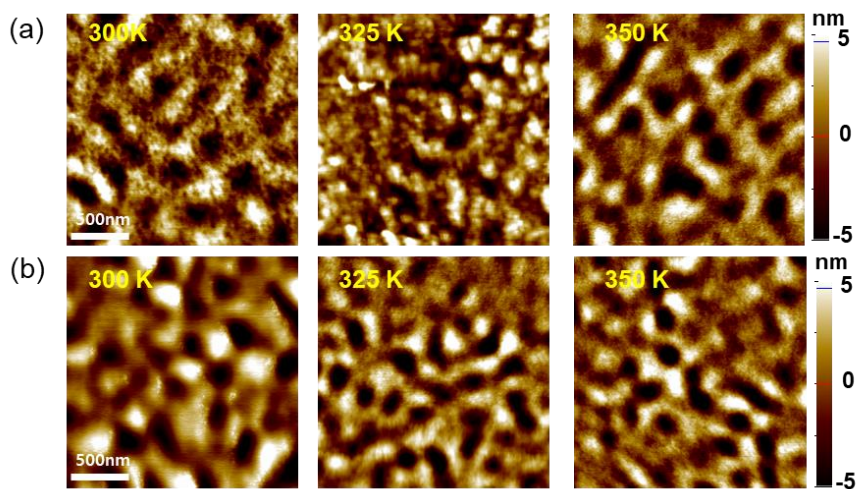

**Fig. S4.** The surface morphology ( $2\ \mu\text{m} \times 2\ \mu\text{m}$ ) of the (a) CBP (50 nm) and (b) CBP (30 nm)/CBP:MoO<sub>3</sub> (20 nm, 10 vol%) films measured using an AFM at various annealing temperatures from 300 K to 350 K.
